1 **Mask, the *Drosophila* Ankyrin Repeat and KH domain-containing protein, regulates**  
2 **microtubule dynamics**

3

4 Mingwei Zhu<sup>1†</sup>, Daniel Martinez<sup>1†</sup>, Jessie J. Guidry<sup>2</sup>, Niles Majeste<sup>1</sup>, Hui Mao<sup>1</sup>, Sarah Yanofsky<sup>1</sup>,  
5 Xiaolin Tian<sup>1\*</sup> and Chunlai Wu<sup>1</sup>

6

7 <sup>1</sup>Neuroscience Center of Excellence, Department of Cell Biology and Anatomy, Louisiana State  
8 University Health Sciences Center, New Orleans, LA 70112, USA

9 <sup>2</sup>Proteomics Core Facility, and the Department of Biochemistry and Molecular Biology,  
10 Louisiana State University Health Sciences Center, New Orleans, LA 70112, USA

11

12 † These authors contributed equally

13 \*Corresponding author

14

15 LSUHSC-NO, Neuroscience Center of Excellence

16 2020 Gravier St. STE.D

17 New Orleans, LA 70112

18 Phone: 504-568-2007

19 Email address: [xtian@lsuhsc.edu](mailto:xtian@lsuhsc.edu)

20

21 **Author Contribution**

22 M.Z. and D. M. collected majority of the data. M.Z., C.W. and X.T. designed the experiments.

23 J.J.G. designed and performed the mass spec analysis, N.M. performed the quantifications of

24 microtubule length, H.M. and S.Y. provided technical supports. X.T. and C.W. prepared the

25 manuscript.

26

27 **Abstract**

28 Proper regulation of microtubule (MT) dynamics is vital for essential cellular processes and  
29 many neuronal activities, including axonal transport and synaptic growth and remodeling. Here  
30 we demonstrate that Mask negatively regulates MT stability and maintains a balanced MT length  
31 and architecture in both fly larval muscles and motor neurons. In larval muscles, loss of *mask*  
32 increases MT length, and altering *mask* genetically modifies the Tau-induced MT fragmentation.  
33 In motor neurons, loss of *mask* function reduces the number of End-Binding Protein 1 (EB1)-  
34 positive MT plus-ends in the axons and results in overexpansion of the presynaptic terminal at  
35 larval neuromuscular junctions (NMJ). *mask* shows strong genetic interaction with *stathmin*  
36 (*stai*), a neuronal modulator of MT dynamics, in regulation of axon transportation and synaptic  
37 terminal stability. The structure/function analysis on Mask suggests that Mask's action in  
38 regulating MT stability does not depend on the nucleotide-binding function of its KH domain.  
39 Furthermore, through a proteomic approach, we found that Mask physically interacts with Jupiter,  
40 an MT stabilizing factor. The MT localization of Jupiter in the axons inversely correlates with  
41 Mask levels, suggesting that Mask may modulate MT stability by inhibiting the association of  
42 Jupiter to MTs.

### 43 **Author Summary**

44 Microtubules (MT) are part of the cytoskeleton of the cells that provides essential structural basis  
45 for critical processes and functions of the cells. A complex factors are required to orchestrate the  
46 assembly and disassembly of MT. Here we identified Mask as a novel regulator for MT  
47 dynamics in fruit flies. Mask negatively regulates MT stability. It shows prominent interplay  
48 with two important modulators of MT, Tau and *Stathmin* (*Stai*), both genes are linked to human  
49 neurodegenerative disorders. These findings not only support the role of Mask as a novel  
50 microtubule regulator, but also provide foundation to explore future therapeutic strategies in  
51 mitigating deficit related to dysfunction of Tau and Stathmin. Our further analysis on Mask  
52 protein demonstrate that Mask can physically interacts with another MT stabilizing factor named  
53 Jupiter. Jupiter can bind to MT, but its localization to the MTs in the axons is negatively  
54 affected by Mask, implying a possible underlying mechanism that Mask may modulate MT  
55 stability by inhibiting the association of Jupiter to MTs.

56

## 57 **Introduction**

58 Terminally differentiated cells such as neurons and muscles use their microtubule (MT) network  
59 not for cell division but rather as architectural components essential for their shape and unique  
60 cellular functions. In addition to supporting the elongation of axons and change of dendritic  
61 morphology in neurons, MTs also act as direction-controlled railways for transporting materials  
62 and organelles between the cell body and pre- and post-synaptic sites (1). MTs can undergo  
63 cycles of dynamic assembly and disassembly (labile) or stay relative stable in a cell type- and  
64 developmental stage-dependent manner (2). For example, MTs in post-mitotic cells, such as  
65 neurons, are generally more stable than MTs in dividing cells; however, within a developing  
66 neuron, MTs at the axon growth cone are much more labile than MTs near the soma (3), and  
67 even in individual axons, MTs consist of domains that differ in stability (4). Recent studies  
68 suggest that both the stable and labile pools of MTs play essential roles for normal neuronal  
69 function. Furthermore, spacing among MTs and distance between MT ends were both shown to  
70 be critical for normal axonal transport (5, 6). Therefore, striking a balanced MT dynamic is key  
71 to maintaining MT-mediated cellular functions.

72 Many proteins and pathways have been identified as potential regulators of MT stability  
73 (2, 7). Among the major proteins controlling MT stability, Stathmin/SCG10 (superior cervical  
74 ganglion-10 protein) and Tau/MAPT are both MT-binding proteins that regulate multiple aspects  
75 of MT stability, including growth and shrinkage, as well as the transition between catastrophe  
76 and rescue. Both Stathmin and Tau are associated with diverse models of neurodegeneration,  
77 axon transport, and cancer (8-11). While *in vitro* studies of Stathmin-related proteins in  
78 mammals suggest that Stathmin promotes destabilization of MTs, studies of *stathmin* (*stai*) in fly  
79 neuromuscular junction (NMJs) showed that *stai* is required for MT stabilization, as well as axon

80 transport and NMJ stability (12, 13). The fly data is consistent with the finding that *stathmin*  
81 knockout mice show age-dependent axonopathy in both central and peripheral nervous systems,  
82 as well as defective motor axon outgrowth and regeneration (14, 15). Tau plays a multifaceted  
83 role in cell survival signaling. On the one hand, loss of Tau function or high levels of  
84 hyperphosphorylated Tau disrupts MT stability, leading to axonal transport defects in motor  
85 neurons and MT breakdown in larval muscles (16). On the other hand, hyperphosphorylated Tau  
86 aggregates form inclusion bodies that are associated with a variety of disorders collectively  
87 referred to as tauopathies, including Alzheimer's disease (Braak, 1991 Acta neuropathol). In  
88 animal models, such as rodents and fruit flies, overexpression of human Tau in the neuronal  
89 tissues leads to progressive neurodegeneration (17).

90 Mask is a 4001-amino-acid protein with a number of functional domains. It bears two  
91 Ankyrin Repeats: one Nuclear Export Signal (NES) and one Nuclear Localization Signal (NLS),  
92 as well as a C-terminal KH domain. The two Ankyrin repeat domains containing 15 and 10  
93 tandem Ankyrin repeats likely coordinately facilitate the ability of Mask to associate with other  
94 proteins, according to the well-documented functions of the Ankyrin domains in mediating  
95 protein-protein interactions in eukaryotic cells (18). NES and NLS motifs may be required for  
96 shuttling Mask protein in and out of the nucleus. The KH domain is an evolutionarily conserved  
97 motif that is about 70 amino acids long, which was first identified in the human heterogeneous  
98 nuclear ribonucleoprotein K (19). KH domains bind RNA or single-stranded DNA (ssDNA) and  
99 are found in proteins that are associated with transcription, translation and mRNA stability  
100 regulation (20, 21). Recent studies showed that mutating the GXXG loop to GDDG in the KH  
101 minimal motif reduced the ability of KH domain to bind RNAs (22). The GXXG loop of Mask  
102 resides in amino acid 3053-3056 as GRGG, which is completely conserved between fly Mask

103 and human ANKHD1 (corresponding sequence 1710-1713). Mask plays an essential role in  
104 mitotic cells to regulate cell proliferation during development (23). It is a major component of  
105 the centrosome and nuclear matrix (24, 25), and a co-transcription factor of the Hippo pathway  
106 (26, 27). Also, its human homolog, ANKHD1, is expressed at relatively high levels in acute  
107 leukemia cells (28) and multiple myeloma cells (29). However, its function in post-mitotic cells,  
108 including neurons and muscle cells, is largely unknown. Here we show that Mask activity is  
109 required for balanced MT stability in two post-mitotic cell types and that *mask* interacts  
110 genetically with two MT-interacting proteins, Tau and Stathmin, whose dysfunctions are linked  
111 with human diseases.

112

## 113 **Results**

### 114 Mask negatively regulates MT length in larval muscles

115 Our previous studies of the putative scaffolding protein Mask demonstrated that overexpressing  
116 Mask ameliorate the degeneration of photoreceptors caused by overexpressing Tau in adult fly  
117 eyes (30). This finding prompted us to explore further potential interactions between Mask and  
118 Tau in the context of microtubule (MT) morphology, given the fact that Tau is a well-studied  
119 MT-binding protein. We first examined the MT morphology in *mask* loss-of-function mutants.  
120 Interestingly, we found that, in the larval body wall muscles, the MTs in *mask* null mutants are  
121 substantially longer than those in wild type control, particularly in the area surrounding the  
122 muscle nuclei (Fig. 1AB). Such a phenotype is fully rescued by introducing the UAS-Mask  
123 transgene back to the *mask* mutant larval muscles (Fig. 1AB). To further confirm this finding, we  
124 introduced *UAS-mask RNAi* to the wild type larval muscle and found that *mask* knockdown also  
125 increased muscular MT length (Fig. 1). These data suggested that normal Mask function in larval  
126 muscles is to restrain MT length.

### 127 Loss of *mask* function suppresses, while upregulation of Mask enhances Tau-induced MT 128 breakdown and toxicity in fly muscles

129 Next, we examined the interplay between Mask and Tau in regulating the MT network in larval  
130 muscles. We co-expressed human Tau protein with *UAS-control*, *UAS-mask RNAi*, or *UAS-Mask*  
131 and analyzed the MT length under each condition. Overexpression of human Tau in fly muscles  
132 causes severe destruction of the MT network, and residual MT becomes short and punctate (Fig.  
133 1 C), which is consistent with a previously reported study on human Tau overexpression in fly



134 muscles (16). Co-expression of *mask* RNAi with Tau substantially increases MT length, while  
135 co-expression of UAS-Mask with Tau further devastates the MT network – MT almost only  
136 exists in bright rod-shaped puncta (Fig. 1C,D).

### 137 Mask regulates presynaptic terminal growth in neuromuscular junctions

138 We next analyzed the neuronal functions of *mask* at the fly larval NMJ. We found that *mask* null  
139 mutant (*mask*<sup>10,22/df</sup>) NMJs show expanded presynaptic terminal growth reflected by an increased  
140 number of bouton, synaptic span, and number of branching points (Fig. 2AB). Such a  
141 morphological defect is due to loss of function of *mask* in the presynaptic motor neurons. First,  
142 pan-neuronal or ubiquitous expression, but not muscle (postsynaptic) expression, of UAS-Mask  
143 rescues the NMJ overgrowth phenotype in *mask* null mutants (Fig. 2AB). Second, neuronal  
144 knockdown of *mask* using a UAS-*mask* RNAi causes similar NMJ expansion as *mask* mutants  
145 (Fig. 2AB). Together these data demonstrate that neuronal Mask is required for controlling  
146 normal NMJ expansion in a cell-autonomous manner. Many genes and pathways were identified  
147 to regulate the presynaptic terminal size. To investigate whether neuronal Mask regulates  
148 presynaptic expansion through its function in regulating MT dynamics, we analyzed the number  
149 of MT plus-ends in the segmental nerve using an MT plus-end tracking protein End-Binding  
150 Protein 1 (EB1) (31). Neuronal knockdown of *mask* significantly reduced the number of EB1-  
151 GFP puncta comparing with control (Fig. 2CD), suggesting that loss of *mask* promoted  
152 elongation of MT in the axonal MT bundles.

153 *mask* and *stathmin* genetically interact with each other to regulate morphology and structural  
154 stability of NMJs.

155 To further investigate Mask's action in regulating MT elongation in neurons, we tested genetic  
156 interaction between *mask* and a well-established modulator of MT stability in neurons – *stathmin*.  
157 Loss of *stathmin* causes severe destabilization of MT in motor neurons, resulting in axonal  
158 transport defects, especially in the posterior segments, as well as premature loss of presynaptic  
159 structure at the nerve terminals (called “footprint” phenotype in *Drosophila* neuromuscular  
160 junctions). We found that the presynaptic NMJ expansion observed in *mask* mutant NMJs is  
161 completely suppressed in the *stai/mask* double mutant NMJs (Fig. 2AB). Similarly, the NMJ  
162 expansion phenotype induced by neuronal knockdown (RNAi) of *mask* can be partially  
163 suppressed by heterozygous *stai* mutation, and completely suppressed by homozygous *stai*  
164 mutation (Fig. 3AB), suggesting a strong genetic interaction between the two genes. In addition,  
165 *mask* loss of function can also reversely suppress neuronal defects caused by loss of *stai*. We  
166 found that both the footprint phenotype and the axonal transport defect of *stai* mutants are  
167 partially suppressed by neuronal knockdown of *mask*, and completely suppressed by *mask* null  
168 mutant (Fig. 3CD), suggesting the ability of enhanced MT stability in *mask* loss of function to  
169 compensate the impaired MT stability caused by loss of *stai*. These data strongly support that,  
170 when together, *mask* and *stai* antagonize each other in their action toward MT stability, and that  
171 *mask* regulates normal NMJ expansion by controlling MT stability.

#### 172 Loss-of-function of *mask* results in elevated MT polymerization

173 Our morphological and genetic analyses suggested that normal function of *mask* is to restrain  
174 MT length. To further confirm this notion, we directly analyzed the rate of Tubulin  
175 polymerization in the cell lysates of wild type or *mask* knockdown larval muscles. We found that  
176 reducing Mask levels does not alter the total Tubulin concentration in muscle homogenates (Fig.

177 4A). In the presence of high-concentration (100  $\mu$ M) taxol (a microtubule stabilization chemical),  
178 Tubulin proteins in both control and *mask knockdown* lysates exist as polymerized forms as they  
179 are detected exclusively in the pellet after ultracentrifugation (Fig. 4A). In the presence of low-  
180 concentrations taxol (0.1  $\mu$ M), more Tubulin proteins were detected in the supernatant fraction  
181 (Tubulin monomer) than the pellet fraction (polymerized Tubulin) after ultracentrifugation.  
182 However, the pellet from *mask*-knockdown muscle lysate contains significantly more  
183 polymerized Tubulin than that from the control lysate (Fig. 4AB). These data suggest that loss of  
184 *mask* activity in the cell lysate results in a condition that promotes MT polymerization.

#### 185 Structure and function analysis of Mask for its action in modulating MT stability

186 In order to determine the domain requirement for Mask's functions, we generated UAS-Mask  
187 transgenes that carry GRGG to GDDG mutation in their KH domain (named UAS-Mask-KH).  
188 We also generated UAS-Mask deletion transgenes that lack either N- or C-terminal portions of  
189 the protein (depicted in Fig. 5A). One resulting transgene contains the two Ankyrin repeats  
190 (named Mask-ANK), and the other resulting transgene lacks the N-terminal portion of Mask and  
191 contains the NES, NLS, and KH domains (named KH-Only).

192 We first expressed the mutant *mask* transgenes in the larval muscles in the *mask* null  
193 mutants and confirmed that they express with predicted molecular weight and at levels  
194 comparable to or higher than that of the wild type *mask* transgene (Fig. 5A). We then specifically  
195 expressed those transgenes in either larval muscles or neurons to examine the abilities of these  
196 transgenes to rescue the *mask* mutant defects in MT length in the muscle and the NMJ expansion  
197 phenotype at the larval neuromuscular junctions, respectively. We found that the UAS-Mask-KH  
198 transgene rescues *mask* mutant MT elongation in muscles (Fig. 5BC) and NMJ expansion at the

199 NMJs (Fig. 5DE) to a level that is comparable to wild type UAS-Mask transgene. These results  
200 suggest that the function of Mask KH domain is not required for Mask's action in regulating MT  
201 stability and presynaptic terminal expansion. However, neither UAS-Mask-KH-Only nor UAS-  
202 Mask-ANK deletion transgenes rescue *mask* mutant phenotypes in the larval muscles or at the  
203 neuromuscular junctions (Fig. 5B-E). In addition, expression of either UAS-Mask-KH-Only or  
204 UAS-Mask-ANK in wild type fly muscle causes pupal lethality similar to *mask* knockdown in  
205 muscle (data not shown), suggesting a dominant-negative effect. Such a dominant-negative  
206 effect indicates that the two truncated Mask proteins are likely folded and retain part of Mask  
207 activity, such as protein-protein interaction. The fact that the two Ankyrin repeat domains are not  
208 sufficient enough to rescue *mask* mutant defects suggests that the Mask C-terminal 1132 amino  
209 acid region, including Mask KH domain, is required for the intact Mask activity.

210 To understand the mechanism of *mask*-mediated regulation of MT stability, we set off to  
211 identify *in vivo* protein binding partners of Mask using the proximity labeling method, a unique  
212 technique in screening for physiologically relevant protein interactions in living cells (32, 33).  
213 By tagging the protein of interest with the promiscuous biotin ligase, these proteins can  
214 biotinylate proximal endogenous proteins *in vivo* in living cells. We generated UAS-based *mask*  
215 transgenes that harbor an N-terminal TurboID tag (34). We then expressed TurboID-Mask in fly  
216 brains using a pan-neuronal Gal4 driver Elav-Gal4 and raised the flies in Biotin-containing food.  
217 In parallel, we also raised Elav-Gal4-only flies in Biotin-containing food and used these flies as  
218 the control for baseline level biotinylation. We dissected ~300 larval brains from each group and  
219 performed affinity purification of biotinylated proteins using streptavidin-beads according to the  
220 established protocol (32, 33). Final elutes from this affinity purification were then analyzed  
221 through shotgun proteomics. Jupiter, an MT-associated protein, was identified as a Mask-binding

222 protein (ratio of TurboID-Mask vs. control: 1.6). To confirm the physical interaction between  
223 Jupiter and Mask, we expressed mCherry-Jupiter in either fly muscles or fly brains, and  
224 performed Co-IP experiments. In larval brain lysates, mCherry-Jupiter co-precipitates with  
225 endogenous Mask, suggesting that Jupiter is a Mask-interacting protein (Fig. 6A).

226 Previous studies suggested that Jupiter may promote the stabilization of MT (35). Next,  
227 we examined how Mask-Jupiter interaction could impact MT stabilization. We co-expressed  
228 UAS-mCherry-Jupiter with UAS-control RNAi, mask RNAi or UAS-Mask in the fly brain and  
229 found that total mCherry-Jupiter expression levels are not altered by gain or loss of *mask* levels  
230 (Fig. 6B). However, Jupiter localization in both the segmental nerve (Fig. 6C, D) and NMJs (Fig.  
231 6E, F) is substantially enhanced by *mask* loss-of-function, and it is significantly reduced by Mask  
232 overexpression. We did not detect MT localization of either endogenous or transgenic Mask  
233 proteins; rather, Mask proteins localize in the neuronal cell bodies surrounding the nuclei (data  
234 not shown). The inversely related Jupiter's association with MT and the abundance of Mask  
235 proteins suggests that Mask prevents Jupiter from localizing to MTs. The strong physical  
236 interaction between Mask and Jupiter proteins and the non-MT localization of Mask suggest that  
237 Mask prevents Jupiter from localizing to the MT by sequestering Jupiter protein away from MTs.

## 238 **Discussion**

239 The characteristics of MT organization and dynamics are cell-type specific. In non-neuronal cells,  
240 MTs are labile and undergo frequent growth and shrinkage due to dynamic instability (36). In  
241 neurons, MTs are generally more stable than MTs in dividing cells, although recent studies  
242 indicate that there are also abundant labile MT fraction in neurons, especially in developing  
243 neurons, and that a balance between labile and stable MT fractions contribute to normal neuronal

244 functions (4). A key MT-mediated neuronal function is axonal transport. Recent *in vivo* imaging  
245 studies of *C. elegans* motor neurons showed that the tiling of the MT fragments in axons is  
246 tightly regulated, and such intrinsic MT organization provides structural basis for efficient cargo  
247 transportation along the axons (6).

248 Decades of studies demonstrated that MT dynamics are tightly regulated by a number of  
249 mechanisms including GTP/GDP ratio, post-translational modification of MT, as well as a vast  
250 array of MT-stabilizing, MT polymerizing and depolymerizing, and MT-severing proteins. Our  
251 studies identify Mask as a novel regulator of MT stability that controls normal neuronal  
252 morphology during development and modulates MT dynamics under pathological conditions that  
253 are related to *stai* and Tau. Loss of *mask* resulted in elongated MTs in larval muscles and  
254 presynaptic over-expansion at the fly larval NMJs, a possible consequence of over-stabilization  
255 of MT as this phenotype is strongly suppressed by *stai*-induced MT destabilization (Fig. 2AB,  
256 Fig. 3AB), and that this phenotype is associated with increased density of Jupiter-mCherry on the  
257 axonal MTs (Fig. 6CD).

258 The function the Mask in regulating MT stability is further supported by its genetic  
259 interactions with *stathmin* and Tau. Previous studies on the effects of overexpressing human Tau  
260 in fly muscles showed that these ectopic Tau proteins are hyperphosphorylated and cause  
261 reduced MT density and enhanced fragmentation, similar to the finding in AD patients and  
262 mouse models (16). We found that Mask is capable of modulating the Tau-induced MT  
263 fragmentation in that loss of Mask enhances, while gain of Mask reduces MT length. Neuronal  
264 Stathmin family proteins are regulators of MT stability, and perturbation of Stathmin expression  
265 impacts neuronal development, plasticity, and regeneration (37). *Drosophila stathmin* mutations

266 cause severely disrupted axonal transport and presynaptic nerve terminal stabilization at the  
267 larval NMJs, likely due to impaired integrity of the MT network (12, 13). Knocking out  
268 mammalian STMN2, also known as SCG10, results in defects in axon outgrowth and  
269 regeneration (15). We found that loss of *mask* in neurons suppresses *stai*-induced axon transport  
270 and NMJ development phenotype in a dose-dependent manner (Fig. 3C-E), suggesting that Mask  
271 antagonizes the action of Stathmin in regulating MT stability. These data also suggested that  
272 defective homeostasis of MT network under pathological conditions can be restored by  
273 manipulating Mask levels in defined cell types.

274         We previously reported that Mask promotes autophagy in fly larval muscles (30). We  
275 then ask whether the ability of Mask to modulate Tau-*induce* MT fragmentation is a result of its  
276 potential ability to regulate abundance of the human Tau protein driven by the GAL4-UAS  
277 expression system in fly larval muscles. In line with the function of Mask to promote autophagic  
278 degradation, the levels of ectopic human Tau protein were significantly reduced when co-  
279 expressed with Mask, and it is substantially increased when co-expressed with *mask* RNAi (Fig.  
280 S1). In addition, Tau proteins in *mask* knockdown muscles start to form aggregated puncta,  
281 possibly due to the elevated levels of the Tau protein. Overexpressing Tau in the muscles causes  
282 the developing animals to die at the pupal stages, and knocking down *mask* suppresses the  
283 lethality (data not shown). These findings suggest that the formation of the Tau aggregates does  
284 not directly correlated with the toxicity caused by Tau in the muscles. The toxicity likely is  
285 primarily caused by severe MT fragmentation induced by Tau expression. MT fragmentation  
286 induced by Tau does not seem to be correlative to Tau protein levels, as co-overexpressing Mask  
287 with Tau not only significantly reduces the levels of the exogenously expressed Tau protein (Fig  
288 S1) but also potently enhances MT fragmentation (Fig. 1). These findings suggests that

289 dysregulation on Tau may cause defects in MT organization that is independent to the toxicity  
290 induced by Tau aggregates.

291 Our loss-of-function studies demonstrated that *mask* is required for normal MT  
292 organization in both neurons and muscles. However, overexpression of Mask reduces MT length  
293 only under a sensitized background where human Tau induces severe MT fragmentation, but not  
294 under an otherwise wild type background, indicating that Mask is not sufficient to drive  
295 significant change in MT dynamics, and other co-factors may be required for such a gain of  
296 function effect. Mask is a large scaffolding protein containing two ankyrin repeats at its N-  
297 terminal and a KH-domain at its C-terminal. Ankyrin-repeats-containing proteins were  
298 implicated in the regulation of MT dynamics. A designed ankyrin repeat protein was shown to  
299 bind to the  $\beta$ -tubulin surface exposed at MT plus-ends with high affinity and cap MT elongation  
300 (38). Two isoforms of *Drosophila* Ankyrin2, Ank2-L and Ank2-XL, regulate MT spacing in  
301 conjunction with Futsch, and therefore control axon caliber and transport (39). The KH-domain,  
302 on the other hand, may mediate Mask's action in regulating RNA alternative splicing (40) as  
303 well as transcription through the HIPPO pathway (26, 27). Our structure/function studies of  
304 Mask functional domains suggested that the two ankyrin repeats domains of Mask are crucial for  
305 Mask's ability to negatively regulate MT elongation/stabilization, although themselves alone are  
306 not sufficient to substitute Mask's action in modulating MT dynamics, and that the C-terminal  
307 portion of protein, including the entire KH domain of Mask, is indispensable for Mask-mediated  
308 regulation on MT dynamics. Together these data support the notion that Mask regulates MT  
309 through protein-protein interactions, but not through its capacity to regulate alternative splicing  
310 or transcription. Through the proximity labeling (BioID) approach, we identified Jupiter as one  
311 of the Mask-interacting proteins and showed that manipulating Mask levels alters the MT



312 localization of Jupiter. One possible interpretation is that Mask, as a non-microtubule associated  
313 protein, physically interacts/sequesters Jupiter and prevents it from promoting MT  
314 polymerization and stability, and therefore, helps achieve a balance in MT dynamics. However,  
315 given that the precise function of Jupiter remains unclear, our current data could not exclude the  
316 possibility that the changes in the levels of MT localization of Jupiter directly correlates with the  
317 amount of the stabilized MT present in the dynamic pool, as Jupiter may preferentially bind to  
318 stabilized MT.

## 319 **Materials and Methods**

### 320 *Drosophila strains, transgenes and genetics*

321 Flies were maintained at 25°C on standard food. The following strains were used in this study:  
322 *mask*<sup>10.22</sup> (23), *mask*<sup>Df317</sup>, UAS-Jupiter-mCherry (41), BG380-Gal4 (neuron specific) (42), MHC-  
323 Gal4 (muscle specific), 24B-GAL4 (muscle-specific), DA-Gal4 (Ubiquitous), UAS-control-  
324 RNAi (P{TRiP.JF01147}), UAS-*mask*-RNAi (P{TRiP.HMS01045}) from the Bloomington  
325 stock center. Generation of the full-length wild type *mask* cDNA was previously described (43).  
326 This cDNA was used to generate pUAST-TurboID-Mask (34) and modified *mask* cDNA,  
327 including pUAST-Mask-KH, pUAST-GFP-Mask-KH-Only, pUAST-Mask-Ank. All transgenic  
328 fly lines were generated by BestGene Inc. (Chino Hills, CA, USA).

### 329 *Western blots*

330 Western blots were performed according to standard procedures. The following primary  
331 antibodies were used: mouse anti- $\beta$ -Tubulin (1:1,000, E7) mouse anti-Alpha-Actin (1:1000,  
332 JLA20 ) from Developmental Studies Hybridoma Bank; rabbit anti-Mask (1:2,000) (23), mouse  
333 anti-mCherry antibody (1:1000, 1C51, NBP1-96752 Novus Biologicals), and rabbit anti-GFP

334 (1:1000, A11122, Invitrogen). All secondary antibodies were used at 1:10,000. Data were  
335 collected using Luminescent Image Analyzer LAS-3000 (FUJIFILM) and quantified using Multi  
336 Gauge (FUJIFILM).

### 337 *Immunocytochemistry*

338 Third instar larvae were dissected in ice-cold PBS and fixed in 4% PFA for 30 min. The fixed  
339 tissues were stained following standard procedures. Rabbit anti-MASK antibody (23) was pre-  
340 absorbed with *mask* mutant tissues and then used at 1:1000. The other primary antibodies used  
341 were: mouse anti-DLG, anti-Futsch and anti- $\beta$ -Tubulin antibodies are from Developmental  
342 Studies Hybridoma Bank, rabbit anti-DVGlut (44), rabbit anti-GFP (A11122, Invitrogen) at  
343 1:1000, rabbit anti-mCherry (632496, Clontech) at 1:1000, mouse anti-Acetylated Tubulin  
344 (T6793, Sigma), mouse anti-Tau (12-6400, Invitrogen) at 1: 1000. The following secondary  
345 antibodies (from Jackson ImmunoResearch ) were used: Cy3-conjugated goat anti-rabbit IgG at  
346 1:1000, Dylight-488-conjugated anti-mouse IgG at 1:1000, and Alexa-Fluor-647-conjugated goat  
347 anti-HRP at 1:1000.

### 348 *Confocal imaging and analysis*

349 Single-layer or z-stack confocal images were captured on a Nikon (Tokyo, Japan) C1 confocal  
350 microscope. Images shown in the same figure were acquired using the same gain from samples  
351 that had been simultaneously fixed and stained. For quantification of microtubule length, z-stack  
352 confocal images of microtubule in larval muscle 6/7 in segment A2 were double-blinded,  
353 IMARIS software (Bitplane, Inc) was used to quantify average MT length in randomly selected  
354 muscle areas.

### 355 *Quantification of microtubule length in fly larval muscles*

356 The microtubule length was measured using IMARIS 9.2.1 imaging software. A 80  $\mu\text{m}$  X 80  $\mu\text{m}$   
357 (1024X1024 pixel resolution) sized image for muscle 6 with step size 0.15  $\mu\text{m}$  covering the  
358 entire depth of muscle volume that contains the microtubule network was used in the analysis. In  
359 each image, two areas of 30 x 30  $\mu\text{m}$  were selected for quantification. For each randomly chosen  
360 area, 100 +/-50 tracing were performed, total number for each muscle sample is on average 250  
361 filaments. In the 3D image, each microtubule was traced manually to ensure the precise tracing.  
362 Switching between 3D View to Slice is often used to properly follow microtubules that may  
363 seem to cross with other MTs in close proximity.

#### 364 *Fractionation of Tubulin*

365 Fractionation of  $\beta$ -tubulin was performed as described by Xiong *et al.* with minor modifications  
366 (16). Larval muscles of 20 larvae from each genotype were dissected in PBS at room temperature  
367 (RT). These muscles were immediately homogenized in 300  $\mu\text{l}$  lysis buffer (150mM KCl, 2mM  
368  $\text{MgCl}_2$ , 50mM Tris, pH 7.5, 2mM EGTA, 2% glycerol, 0.125% Triton X-100, protease inhibitor  
369 cocktail) containing either 100  $\mu\text{M}$  or 100 nM Taxol. After incubating for 10 min at RT, the  
370 homogenates were centrifuged at 1,500 X g for 5 minutes at RT to remove cellular debris. A  
371 small aliquot of the supernatant of each sample was collected to analyze the total  $\beta$ -Tubulin level.  
372 The remaining supernatant was ultra-centrifuged at 100,000 g for 30 minutes. After  
373 ultracentrifugation, each supernatant and pellet were separated and analyzed by SDS-PAGE and  
374 western blots.

#### 375 *Generation of UAS-TurboID-Mask transgene*

376 The TurboID fragment was amplified by PCR using the V5-TurboID-NES-pCDNA3 plasmid  
377 (Addgene 107169) as the template. Two PCR primers were used: forward primer-

378 5'atctGAATTCatgggcaagcccatcccaaa3'; and reverse primer-  
379 5'actcAGATCTgctgctccgctcccgatccgctccgcctgcagcttttcggcagacc3'. The resulting fragment  
380 no longer contains the NES signal, while at the time includes an EcoRI site at the 5' end, a BglII  
381 site at the 3' end, and a linker sequence (GlyGlyGlyGlySerGlyGlyGlyGlySer). This fragment  
382 was subsequently cloned into the pGEM T-easy vector (Promega), then excised out with EcoRI  
383 and BglII and cloned into the pUAST plasmid, resulting in the plasmid vector "pUAST-  
384 TurboID".

385 An 11kb Mask sequence was excised out with BglII and XbaI from the pUAST-Mask plasmid  
386 (43) and ligated with the pUAST-TurboID vector to generate an intermediate construct. A 1.2kb  
387 Mask fragment with BglII ends was then ligated with this intermediate construct to generate the  
388 final pUAST-TurboID-Mask plasmid. The generation of the transgenic flies was aided by  
389 Bestgene, Inc.

#### 390 *Purification and enrichment of biotinylated proteins*

391 The procedures for the purification and the enrichment of biotinylated proteins was adapted from  
392 (32). The TurboID-Mask transgene was expressed in all neurons under the control of the elav-  
393 Gal4 driver. 300 fly larval brains were dissected and homogenized in 1000ul lysis buffer (2M  
394 urea in 50 mM Tris·Cl pH 7.4, 1× protease inhibitor, 1 mM dithiothreitol (DTT), and 1%  
395 TritonX-100). After 5 minutes of incubation at room temperature, the homogenate was  
396 centrifuged at 16,500xg at 4°C for 10 minutes. The biotinylated proteins were then pulldown by  
397 incubating the supernatant with prewashed 100ul of Magnabind Streptavidin beads (Invitrogen)  
398 over night at 4°C. After rinsing with the lysis buffer for 4 times and twice with RIPA buffer (50  
399 mM Tris pH 8, 150 mM NaCl, 0.1% SDS, 0.5% sodium deoxycholate, 1% Triton X-100, 1×

400 protease inhibitor cocktail (Sigma-Aldrich), 1 mM PMSF), the beads are ready for proteomic  
401 analysis via LC-MS.

#### 402 *Liquid Chromatography-Mass Spectrometry (LC-MS)*

403 The procedure was adapted from (34). After several washes in 50mM Tris, pH 7.5 containing  
404 2M Urea, beads and bound biotinylated proteins were incubated with 0.5ug trypsin in 50mM Tris,  
405 pH 7.5/2M Urea for 1 hour with shaking. This step was repeated for a second 15-minute period.  
406 These supernatants were pooled, the cysteines were reduced during a 1 hour incubation at 55°C  
407 with 2ul of 500mM tris(2-carboxyethyl)phosphine, and subsequently alkylated with a 30-minute  
408 incubation with 5ul of 375mM Iodoacetamide in the dark. An additional 0.5ug of trypsin was  
409 added for an overnight incubation at room temperature.

410 The next day, samples were acidified by the addition of Trifluoroacetic acid until 0.5%, and then  
411 trypsinized peptides were purified using C18 tips (Thermo). The eluted peptides were dried to  
412 completion until ready for LC-MS analysis.

413 The samples were run on a Dionex U3000 nano flow system coupled to a Thermo Fusion mass  
414 spectrometer. Each sample was subjected to a 65-minute chromatographic method employing a  
415 gradient from 2-25% Acetonitrile in 0.1% Formic Acid (ACN/FA) over the course of 25 minutes,  
416 from 25 to 35% ACN/FA for an additional 10 minutes, from 35 to 50% ACN/FA for an  
417 additional 4 minutes, a step to 90% ACN/FA for 4 minutes and a re-equilibration into 2%  
418 ACN/FA. Chromatography was carried out in a “trap-and-load” format using a PicoChip source  
419 (New Objective, Woburn, MA); trap column C18 PepMap 100, 5um, 100A and the separation  
420 column was PicoChip REPROSIL-Pur C18-AQ, 3um, 120A, 105mm. The entire run was  
421 0.3ul/min flow rate. Electrospray was achieved at 1.9kV

422 MS1 scans were performed in the Orbitrap utilizing a resolution of 240,000. And data dependent  
423 MS2 scans were performed in the Orbitrap using High Energy Collision Dissociation (HCD) of  
424 30% using a resolution of 30,000.

425 Data analysis was performed using Proteome Discoverer 2.3 using SEQUEST HT scoring. The  
426 background proteome was Drosophila melanogaster (SwissProt TaxID 7227, version 2017-07-05,  
427 downloaded on 01/19/2018). Static modification included carbamidomethyl on cysteines  
428 (=57.021), and dynamic modification of methionine oxidation (=15.9949). Parent ion tolerance  
429 was 10ppm, fragment mass tolerance was 0.02Da, and the maximum number of missed  
430 cleavages was set to 2. Only high scoring peptides were considered utilizing a false discovery  
431 rate (FDR) of 1%. Label Free Quantitation was performed on individual sample files and  
432 quantitative ratios were compared to control samples.

#### 433 *Statistical analysis*

434 Statistical analysis was performed, and graphs were generated in Origin (Origin Lab,  
435 Northampton, MA). Each sample was compared with other samples in the group (more than two)  
436 using ANOVA, or with the other sample in a group of two using T-test. All histograms are  
437 shown as mean  $\pm$  SEM. The n numbers of each statistical analysis are indicated in the graph.

438

439 **Acknowledgments**

440

441 We would like to thank Michael Simon for the *mask* mutant alleles and the anti-Mask antibodies,  
442 Chris Doe for the UAS-Jupiter-mCherry transgene, the Bloomington Stock center for other fly  
443 stocks, and Developmental Studies Hybridoma Bank, created by the NICHD of the NIH and  
444 maintained at The University of Iowa, Department of Biology, Iowa City, IA 52242, for  
445 antibodies. We also thank Liz McGehee for editorial assistance. This work is supported by a  
446 Start-up fund from LSUHSC to X.T. and an ALS Association Grant (18-IIA-414) to C.W. The  
447 Proteomics Project described was supported by a grant from the National Institute of Health  
448 Grant P30 GM103514.

449

## 450 **References**

- 451 1. Kapitein LC, Hoogenraad CC. Building the Neuronal Microtubule Cytoskeleton. *Neuron*.  
452 2015;87(3):492-506.
- 453 2. van der Vaart B, Akhmanova A, Straube A. Regulation of microtubule dynamic instability.  
454 *Biochem Soc Trans*. 2009;37(Pt 5):1007-13.
- 455 3. Hur EM, Saijilafu, Zhou FQ. Growing the growth cone: remodeling the cytoskeleton to promote  
456 axon regeneration. *Trends Neurosci*. 2012;35(3):164-74.
- 457 4. Baas PW, Rao AN, Matamoros AJ, Leo L. Stability properties of neuronal microtubules.  
458 *Cytoskeleton (Hoboken, NJ)*. 2016;73(9):442-60.
- 459 5. Hahn I, Voelzmann A, Liew Y-T, Costa-Gomes B, Prokop A. The model of local axon homeostasis -  
460 explaining the role and regulation of microtubule bundles in axon maintenance and pathology. *Neural*  
461 *Development*. 2019;14(1):11.
- 462 6. Yogev S, Cooper R, Fetter R, Horowitz M, Shen K. Microtubule Organization Determines Axonal  
463 Transport Dynamics. *Neuron*. 2016;92(2):449-60.
- 464 7. Bowne-Anderson H, Hibbel A, Howard J. Regulation of Microtubule Growth and Catastrophe:  
465 Unifying Theory and Experiment. *Trends in cell biology*. 2015;25(12):769-79.
- 466 8. Rossi G, Redaelli V, Contiero P, Fabiano S, Tagliabue G, Perego P, et al. Tau Mutations Serve as a  
467 Novel Risk Factor for Cancer. *Cancer research*. 2018;78(13):3731-9.
- 468 9. Tararuk T, Ostman N, Li W, Bjorkblom B, Padzik A, Zdrojewska J, et al. JNK1 phosphorylation of  
469 SCG10 determines microtubule dynamics and axodendritic length. *J Cell Biol*. 2006;173(2):265-77.
- 470 10. Wen HL, Lin YT, Ting CH, Lin-Chao S, Li H, Hsieh-Li HM. Stathmin, a microtubule-destabilizing  
471 protein, is dysregulated in spinal muscular atrophy. *Human molecular genetics*. 2010;19(9):1766-78.
- 472 11. Strang KH, Golde TE, Giasson BI. MAPT mutations, tauopathy, and mechanisms of  
473 neurodegeneration. *Laboratory investigation; a journal of technical methods and pathology*.  
474 2019;99(7):912-28.
- 475 12. Graf ER, Heerssen HM, Wright CM, Davis GW, DiAntonio A. Stathmin is required for stability of  
476 the *Drosophila* neuromuscular junction. *J Neurosci*. 2011;31(42):15026-34.
- 477 13. Duncan JE, Lytle NK, Zuniga A, Goldstein LS. The Microtubule Regulatory Protein Stathmin Is  
478 Required to Maintain the Integrity of Axonal Microtubules in *Drosophila*. *PLoS one*. 2013;8(6):e68324.
- 479 14. Liedtke W, Leman EE, Fyffe RE, Raine CS, Schubart UK. Stathmin-deficient mice develop an age-  
480 dependent axonopathy of the central and peripheral nervous systems. *The American journal of*  
481 *pathology*. 2002;160(2):469-80.
- 482 15. Klim JR, Williams LA, Limone F, Guerra San Juan I, Davis-Dusenbery BN, Mordes DA, et al. ALS-  
483 implicated protein TDP-43 sustains levels of STMN2, a mediator of motor neuron growth and repair. *Nat*  
484 *Neurosci*. 2019;22(2):167-79.
- 485 16. Xiong Y, Zhao K, Wu J, Xu Z, Jin S, Zhang YQ. HDAC6 mutations rescue human tau-induced  
486 microtubule defects in *Drosophila*. *Proc Natl Acad Sci U S A*. 2013;110(12):4604-9.
- 487 17. Wittmann CW, Wszolek MF, Shulman JM, Salvaterra PM, Lewis J, Hutton M, et al. Tauopathy in  
488 *Drosophila*: neurodegeneration without neurofibrillary tangles. *Science*. 2001;293(5530):711-4.
- 489 18. Mosavi LK, Cammett TJ, Desrosiers DC, Peng ZY. The ankyrin repeat as molecular architecture for  
490 protein recognition. *Protein science : a publication of the Protein Society*. 2004;13(6):1435-48.



- 491 19. Musco G, Kharrat A, Stier G, Fraternali F, Gibson TJ, Nilges M, et al. The solution structure of the  
492 first KH domain of FMR1, the protein responsible for the fragile X syndrome. *Nature structural biology*.  
493 1997;4(9):712-6.
- 494 20. Garcia-Mayoral MF, Hollingworth D, Masino L, Diaz-Moreno I, Kelly G, Gherzi R, et al. The  
495 structure of the C-terminal KH domains of KSRP reveals a noncanonical motif important for mRNA  
496 degradation. *Structure (London, England : 1993)*. 2007;15(4):485-98.
- 497 21. Grishin NV. KH domain: one motif, two folds. *Nucleic acids research*. 2001;29(3):638-43.
- 498 22. Hollingworth D, Candel AM, Nicastro G, Martin SR, Briata P, Gherzi R, et al. KH domains with  
499 impaired nucleic acid binding as a tool for functional analysis. *Nucleic acids research*. 2012;40(14):6873-  
500 86.
- 501 23. Smith RK, Carroll PM, Allard JD, Simon MA. MASK, a large ankyrin repeat and KH domain-  
502 containing protein involved in *Drosophila* receptor tyrosine kinase signaling. *Development (Cambridge,*  
503 *England)*. 2002;129(1):71-82.
- 504 24. Kallappagoudar S, Varma P, Pathak RU, Senthilkumar R, Mishra RK. Nuclear matrix proteome  
505 analysis of *Drosophila melanogaster*. *Mol Cell Proteomics*. 2010;9(9):2005-18.
- 506 25. Muller H, Schmidt D, Steinbrink S, Mirgorodskaya E, Lehmann V, Habermann K, et al. Proteomic  
507 and functional analysis of the mitotic *Drosophila* centrosome. *EMBO J*. 2010;29(19):3344-57.
- 508 26. Sansores-Garcia L, Atkins M, Moya IM, Shahmoradgoli M, Tao C, Mills GB, et al. Mask is required  
509 for the activity of the Hippo pathway effector Yki/YAP. *Current biology : CB*. 2013;23(3):229-35.
- 510 27. Sidor CM, Brain R, Thompson BJ. Mask proteins are cofactors of Yorkie/YAP in the Hippo  
511 pathway. *Current biology : CB*. 2013;23(3):223-8.
- 512 28. Traina F, Favaro PM, Medina Sde S, Duarte Ada S, Winnischofer SM, Costa FF, et al. ANKHD1,  
513 ankyrin repeat and KH domain containing 1, is overexpressed in acute leukemias and is associated with  
514 SHP2 in K562 cells. *Biochimica et biophysica acta*. 2006;1762(9):828-34.
- 515 29. Dhyani A, Duarte AS, Machado-Neto JA, Favaro P, Ortega MM, Olalla Saad ST. ANKHD1 regulates  
516 cell cycle progression and proliferation in multiple myeloma cells. *FEBS letters*. 2012;586(24):4311-8.
- 517 30. Zhu M, Zhang S, Tian X, Wu C. Mask mitigates MAPT- and FUS-induced degeneration by  
518 enhancing autophagy through lysosomal acidification. *Autophagy*. 2017;13(11):1924-38.
- 519 31. Akhmanova A, Steinmetz MO. Control of microtubule organization and dynamics: two ends in  
520 the limelight. *Nature reviews Molecular cell biology*. 2015;16(12):711-26.
- 521 32. Roux KJ, Kim DI, Burke B, May DG. BioID: A Screen for Protein-Protein Interactions. *Current*  
522 *protocols in protein science*. 2018;91:19.23.1-19.23.15.
- 523 33. Roux KJ, Kim DI, Raida M, Burke B. A promiscuous biotin ligase fusion protein identifies proximal  
524 and interacting proteins in mammalian cells. *Journal of Cell Biology*. 2012;196(6):801-10.
- 525 34. Branon TC, Bosch JA, Sanchez AD, Udeshi ND, Svinkina T, Carr SA, et al. Efficient proximity  
526 labeling in living cells and organisms with TurboID. *Nature biotechnology*. 2018;36(9):880-7.
- 527 35. Karpova N, Bobinnec Y, Fouix S, Huitorel P, Debec A. Jupiter, a new *Drosophila* protein  
528 associated with microtubules. *Cell motility and the cytoskeleton*. 2006;63(5):301-12.
- 529 36. Mitchison T, Kirschner M. Dynamic instability of microtubule growth. *Nature*.  
530 1984;312(5991):237-42.
- 531 37. Chauvin S, Sobel A. Neuronal stathmins: a family of phosphoproteins cooperating for neuronal  
532 development, plasticity and regeneration. *Progress in neurobiology*. 2015;126:1-18.
- 533 38. Pecqueur L, Duellberg C, Dreier B, Jiang Q, Wang C, Pluckthun A, et al. A designed ankyrin repeat  
534 protein selected to bind to tubulin caps the microtubule plus end. *Proc Natl Acad Sci U S A*.  
535 2012;109(30):12011-6.

- 536 39. Stephan R, Goellner B, Moreno E, Frank CA, Hugenschmidt T, Genoud C, et al. Hierarchical  
537 Microtubule Organization Controls Axon Caliber and Transport and Determines Synaptic Structure and  
538 Stability. *Developmental cell*. 2015;33(1):5-21.
- 539 40. Brooks AN, Duff MO, May G, Yang L, Bolisetty M, Landolin J, et al. Regulation of alternative  
540 splicing in *Drosophila* by 56 RNA binding proteins. *Genome research*. 2015;25(11):1771-80.
- 541 41. Chabu C, Doe CQ. Dap160/intersectin binds and activates aPKC to regulate cell polarity and cell  
542 cycle progression. *Development*. 2008;135(16):2739.
- 543 42. Budnik V, Koh YH, Guan B, Hartmann B, Hough C, Woods D, et al. Regulation of synapse  
544 structure and function by the *Drosophila* tumor suppressor gene *dlg*. *Neuron*. 1996;17(4):627-40.
- 545 43. Zhu M, Li X, Tian X, Wu C. Mask loss-of-function rescues mitochondrial impairment and muscle  
546 degeneration of *Drosophila* pink1 and parkin mutants. *Human molecular genetics*. 2015;24(11):3272-85.
- 547 44. Daniels RW, Collins CA, Gelfand MV, Dant J, Brooks ES, Krantz DE, et al. Increased expression of  
548 the *Drosophila* vesicular glutamate transporter leads to excess glutamate release and a compensatory  
549 decrease in quantal content. *J Neurosci*. 2004;24(46):10466-74.

550

551

552

## 553 **Figure Legends**

554 **Figure 1: *mask* negatively regulates microtubule stability in larval muscle and enhances**  
555 **Tau-induced MT fragmentation.**

556 (A) Representative confocal images of microtubule (MT) in muscle 6 of wild type, *mask* null  
557 (*mask*<sup>10.22/Df</sup>), rescue of *mask* null with a UAS-Mask transgene driven by a muscle-specific 24B-  
558 Gal4 line, and 24B-Gal4-driven UAS-*mask* RNAi. MTs are immunostained with an anti-  
559 Acetylated Tubulin (Ace-Tub) antibody. Yellow dash lines denote the edge of muscle nuclei.  
560 Scale bar: 5µm. (B) Quantification of average MT lengths. (C) Representative confocal images  
561 of MT in muscle 6 of wild type, 24B-Gal4-driven UAS-human Tau (hTau) with UAS-Td-  
562 Tomato, UAS-*mask* RNAi, or UAS-Mask. MTs are immunostained with an anti-Acetylated  
563 Tubulin (Ace-Tub) antibody. Scale bar: 5µm. (D) Quantification of average MT lengths.

564 **Figure 2: Mask promotes normal NMJ terminal growth by regulating motor neuron**  
565 **microtubule stability.**

566 (A) Representative confocal images of muscle 4 NMJs in wild type, *mask* null (*mask*<sup>10.22/Df</sup>),  
567 rescues of *mask* null with a UAS-Mask transgene driven by by pan-neuron (BG380), ubiquitous  
568 (DA) or muscle (MHC) Gal4 lines, respectively, and *stathmin/mask* double mutant (*stai*<sup>B200/L27</sup>;  
569 *mask*<sup>10.22/Df</sup>). Scale bar: 10 µm. (B) quantification of the number of boutons, synaptic span and  
570 the number of branching points at the M4 NMJs. Each data point was normalized to the size of  
571 the muscle 4. (C) Representative confocal images of segmental nerves immunostained with an  
572 anti-GFP antibody in 3<sup>rd</sup> instar larvae of Elav-driven UAS-EB1-GFP with UAS-vector or UAS-

573 *mask* RNAi. Scale bar: 20  $\mu$ m. **(D)** Quantification of average number of EB1-GFP puncta  
574 normalized by nerve area.

575 **Figure 3: Genetic interactions between *mask* and *stai*.** **(A, B)** Loss of *stai* function suppresses  
576 synaptic terminal over-expansion caused by *mask* loss-of-function in a dose-dependent manner.  
577 **(A)** Representative confocal images of muscle 4 NMJs in larvae with Elav-driven UAS-vector,  
578 Elav-driven UAS-*mask* RNAi in wild type background, *stai* heterozygous (*stai*<sup>B200/+</sup>) or *stai*  
579 (*stai*<sup>B200/L27</sup>) homozygous mutant backgrounds. Scale bar, 10  $\mu$ m. **(B)** quantification of the  
580 number of boutons, synaptic span and the number of branching points at the M4 NMJs. Each  
581 data point was normalized to the size of the muscle 4. NMJs are immunostained with anti-HRP  
582 (red) and anti-DVGlut (green) antibodies. **(C, D, E)** Loss of *mask* function in neurons suppresses  
583 *stai* mutant defects in NMJ development and axonal transport. **(C, D)** Representative confocal  
584 images of muscle 4 NMJs (C) and lateral nerve bundles (D) in wild type, *stai* (*stai*<sup>B200/L27</sup>),  
585 *stai/mask* double mutant (*stai*<sup>B200/L27</sup>;*mask*<sup>10.22/Df</sup>), or *stai* mutant with pan-neuronal expression of  
586 *mask* RNAi. Larval NMJs were immunostained with anti-DVGlut (green), anti-DLG (red), and  
587 anti-HRP (blue). Arrows point to synaptic boutons that have postsynaptic DLG staining but lack  
588 presynaptic DVGLut staining (so-called ghost boutons). Brackets highlight lateral axons that  
589 shows residual DVGLut staining. Scale bars, 10  $\mu$ m for C; 5  $\mu$ m for D. **(E)** Quantification of the  
590 number of ghost boutons in muscle 4 NMJs at segment A3 and A4, and axonal accumulation of  
591 DVGlut.

592 **Figure 4, Loss of *mask* enhanced MT polymerization in fly larval muscle lysates.**

593 **(A)** Western analysis of total proteins and ultracentrifugal fractions (supernatant and pellet) in  
594 larval muscle lysates from wild type control or *mask* knockdown (24B-Gal4-driven *mask* RNAi).

595 Lysates were treated with either 100  $\mu$ m or 100 nm Taxol. Anti-beta-Tubulin and anti-alpha-  
596 Actin blots were performed on total and ultracentrifugal fractions of both lysates. Anti-Mask blot  
597 was performed on lysates treated with 100 nm Taxol. The asterisks indicate the endogenous  
598 Mask protein band. (B) Quantification of the relative levels of polymerized Tubulin in the pellet  
599 fraction in the lysate treated by 100 nm Taxol. The levels of polymerized Tubulin were  
600 normalized to the levels of total Tubulin. Error bars indicate SEM. n = 3 trials.

601 **Figure 5, Rescue experiments identify structural requirement for Mask's action in**  
602 **regulating MT stability.**

603 (A) A schematic of wild type and modified UAS-Mask transgenes used in the rescue  
604 experiments and representative western blots showing muscle expression of Mask in wild type,  
605 *mask* null mutant, as well as *mask* null expressing each of the four UAS-Mask transgenes in  
606 muscles. Note that the anti-Mask antibody does not recognize GFP-Mask-KH-Only protein,  
607 indicating the antigen of this antibody is outside of the Mask-KH-Only region. Anti-GFP western  
608 blots were performed to show GFP-Mask-KH-Only (as indicated by an asterisk). (B)  
609 Representative confocal images of MT in muscle 6 of wild type, *mask* null (*mask*<sup>10.22/Df</sup>), rescues  
610 of *mask* null with MHC-Gal4-driven UAS-Mask, UAS-Mask-KH, UAS-Mask-KH-Only, or  
611 UAS-Mask-ANK. Scale bar: 10  $\mu$ m. (C) Quantification of average MT lengths. (D)  
612 Representative confocal images of muscle 4 NMJs in wild type, *mask* null (*mask*<sup>10.22/Df</sup>), rescues  
613 of *mask* null with pan-neuron (BG380) driven wild type or modified UAS-Mask transgenes as  
614 shown in A. Scale bar: 10  $\mu$ m. (E) quantification of the number of boutons, synaptic span and the  
615 number of branching points at the M4 NMJs. Each data point was normalized to the size of the  
616 muscle 4.

617 **Figure 6, Mask interacts with Jupiter and regulates its localization to microtubules.**

618 (A) Representative western blots showing co-IP of endogenous Mask and mCh-Jupiter in lysates  
619 from larval brains. Note that Mask protein undergo certain degree of degradation after  
620 immunoprecipitation as indicated by faster migration in SDS-PAGE. (D, F) Representative  
621 confocal images of segmental nerves (D), or muscle 4 NMJs (F), immune-stained with anti-  
622 mCherry (Red) and anti-Futsch (gree) antibodies in 3<sup>rd</sup> instar larvae of Elav-driven UAS-mCh-  
623 Jupiter with UAS-control RNAi, UAS-mask RNAi or UAS-Mask. (E, G) Quantification of  
624 mean intensity of mCherry and Futsch. Scale bars: 10  $\mu$ m.

625 Supplement Figure 1, Mask regulates the abundance of Tau protein in larval muscles.

626 (A) Representative confocal images of hTau expression in muscle 6 of 24B-Gal4-driven UAS-  
627 human Tau (hTau) with UAS-Td-Tomato, UAS-*mask* RNAi, or UAS-Mask. Human Tau  
628 proteins are immunostained with an anti-Tau antibody. Scale bar: 10  $\mu$ m. (B) Quantification of  
629 mean intensity of hTau expression levels.

630

631 **Supplement Figure 1, Mask regulates the abundance of Tau protein in larval muscles.**

632 (A) Representative confocal images of hTau expression in muscle 6 of 24B-Gal4-driven UAS-  
633 human Tau (hTau) with UAS-Td-Tomato, UAS-*mask* RNAi, or UAS-Mask. Human Tau  
634 proteins are immunostained with an anti-Tau antibody. Scale bar: 10  $\mu$ m. (B) Quantification of  
635 mean intensity of hTau expression levels.

# Figure 1

A

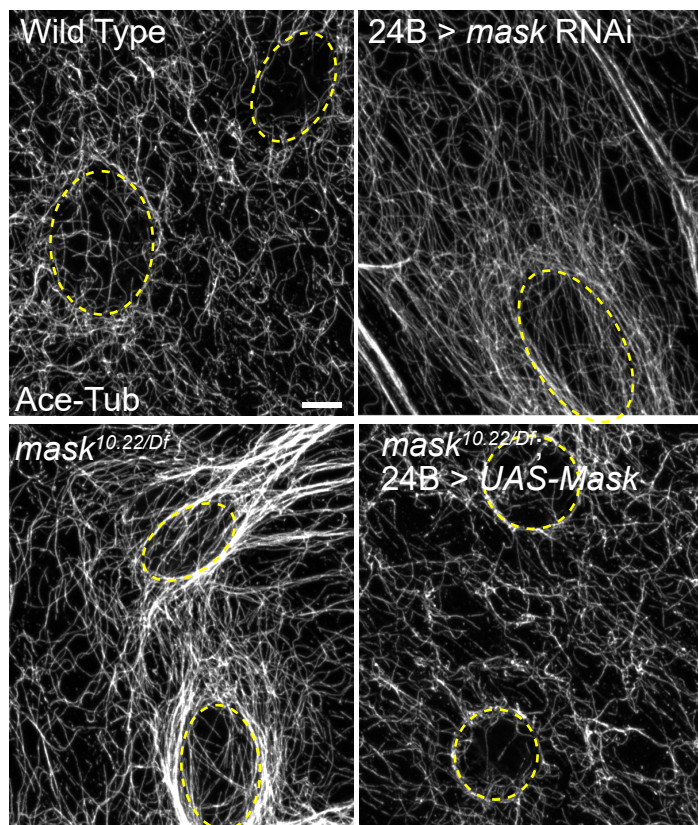

B

■ Wild Type  
 24B > *UAS-mask-RNAi*  
 *mask*<sup>10.22/Df</sup>  
 *mask*<sup>10.22/Df</sup>, 24B > *UAS-Mask*

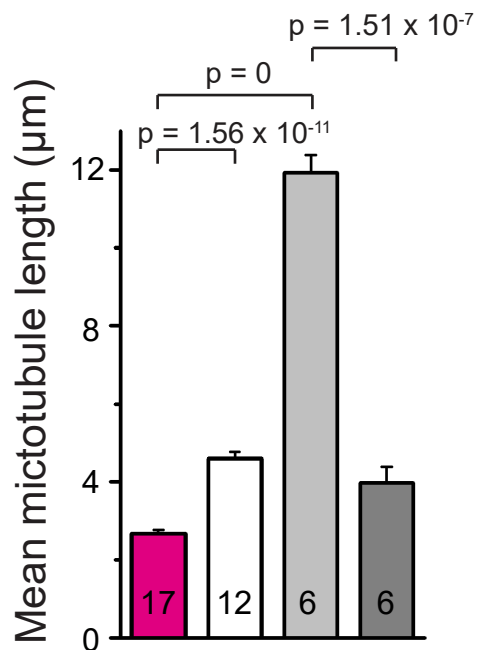

C

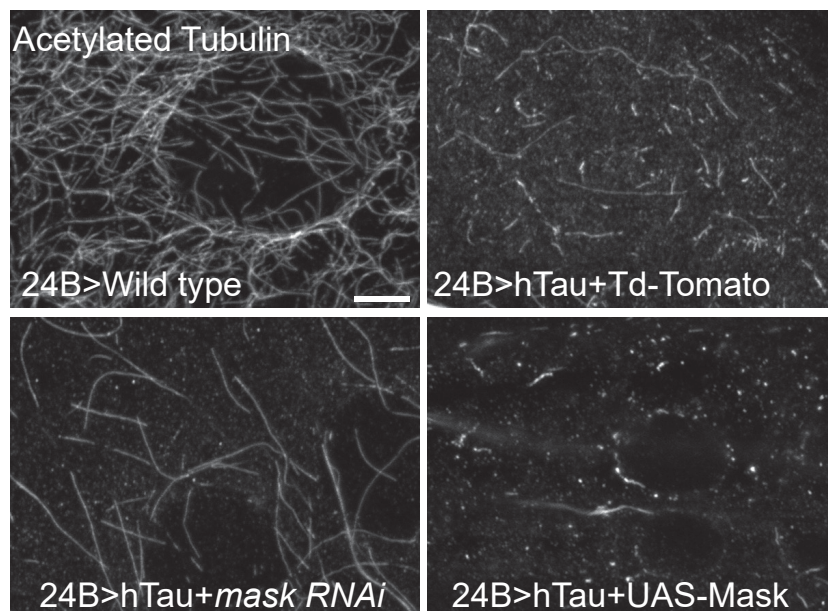

D

24B>Wild type  
 24B>hTau+Td-Tomato  
 24B>hTau+*mask* RNAi  
 24B>hTau+UAS-Mask

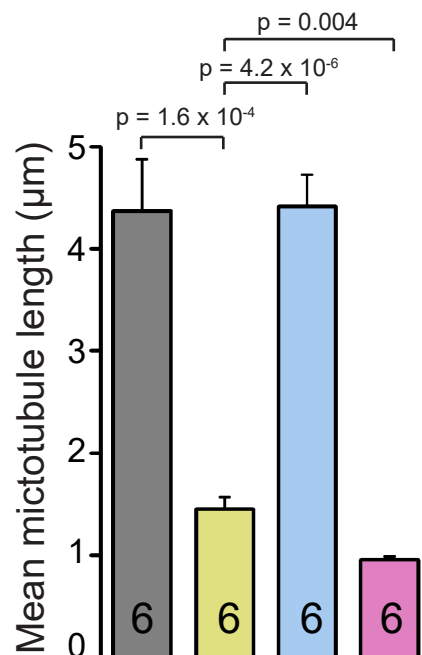

## Figure 2

A

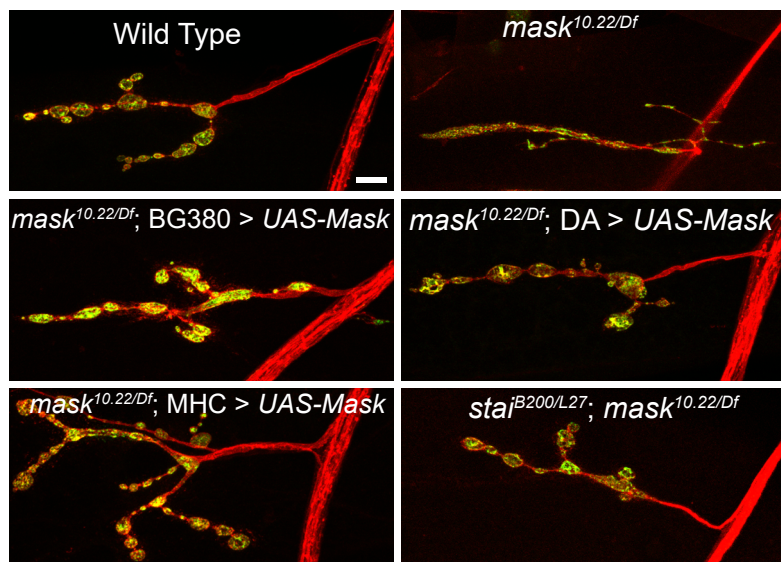

B

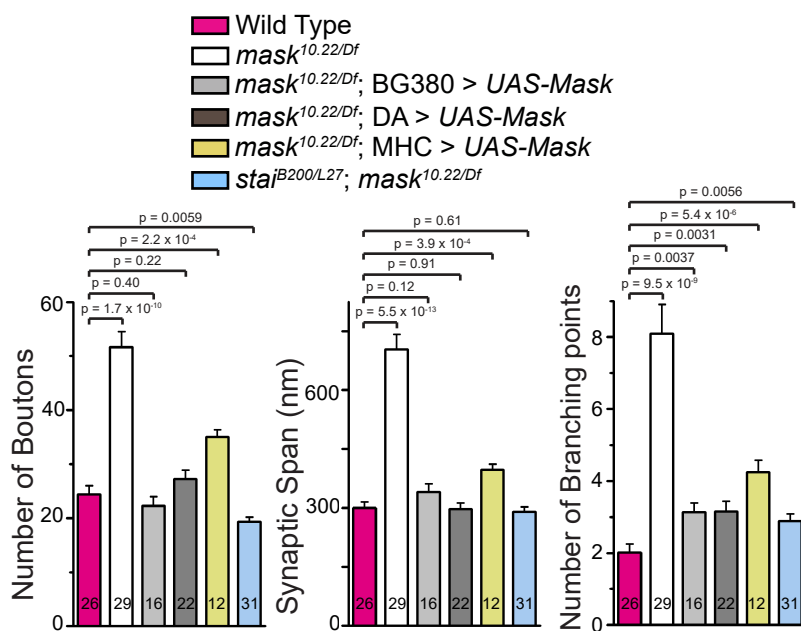

C

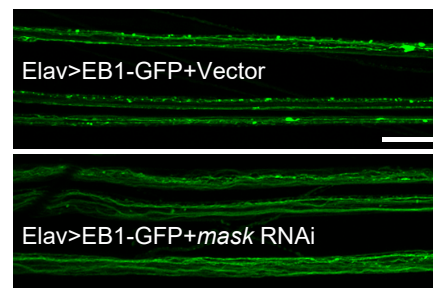

D

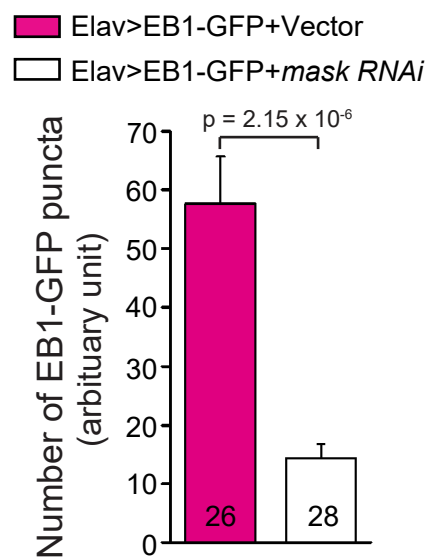



# Figure 3

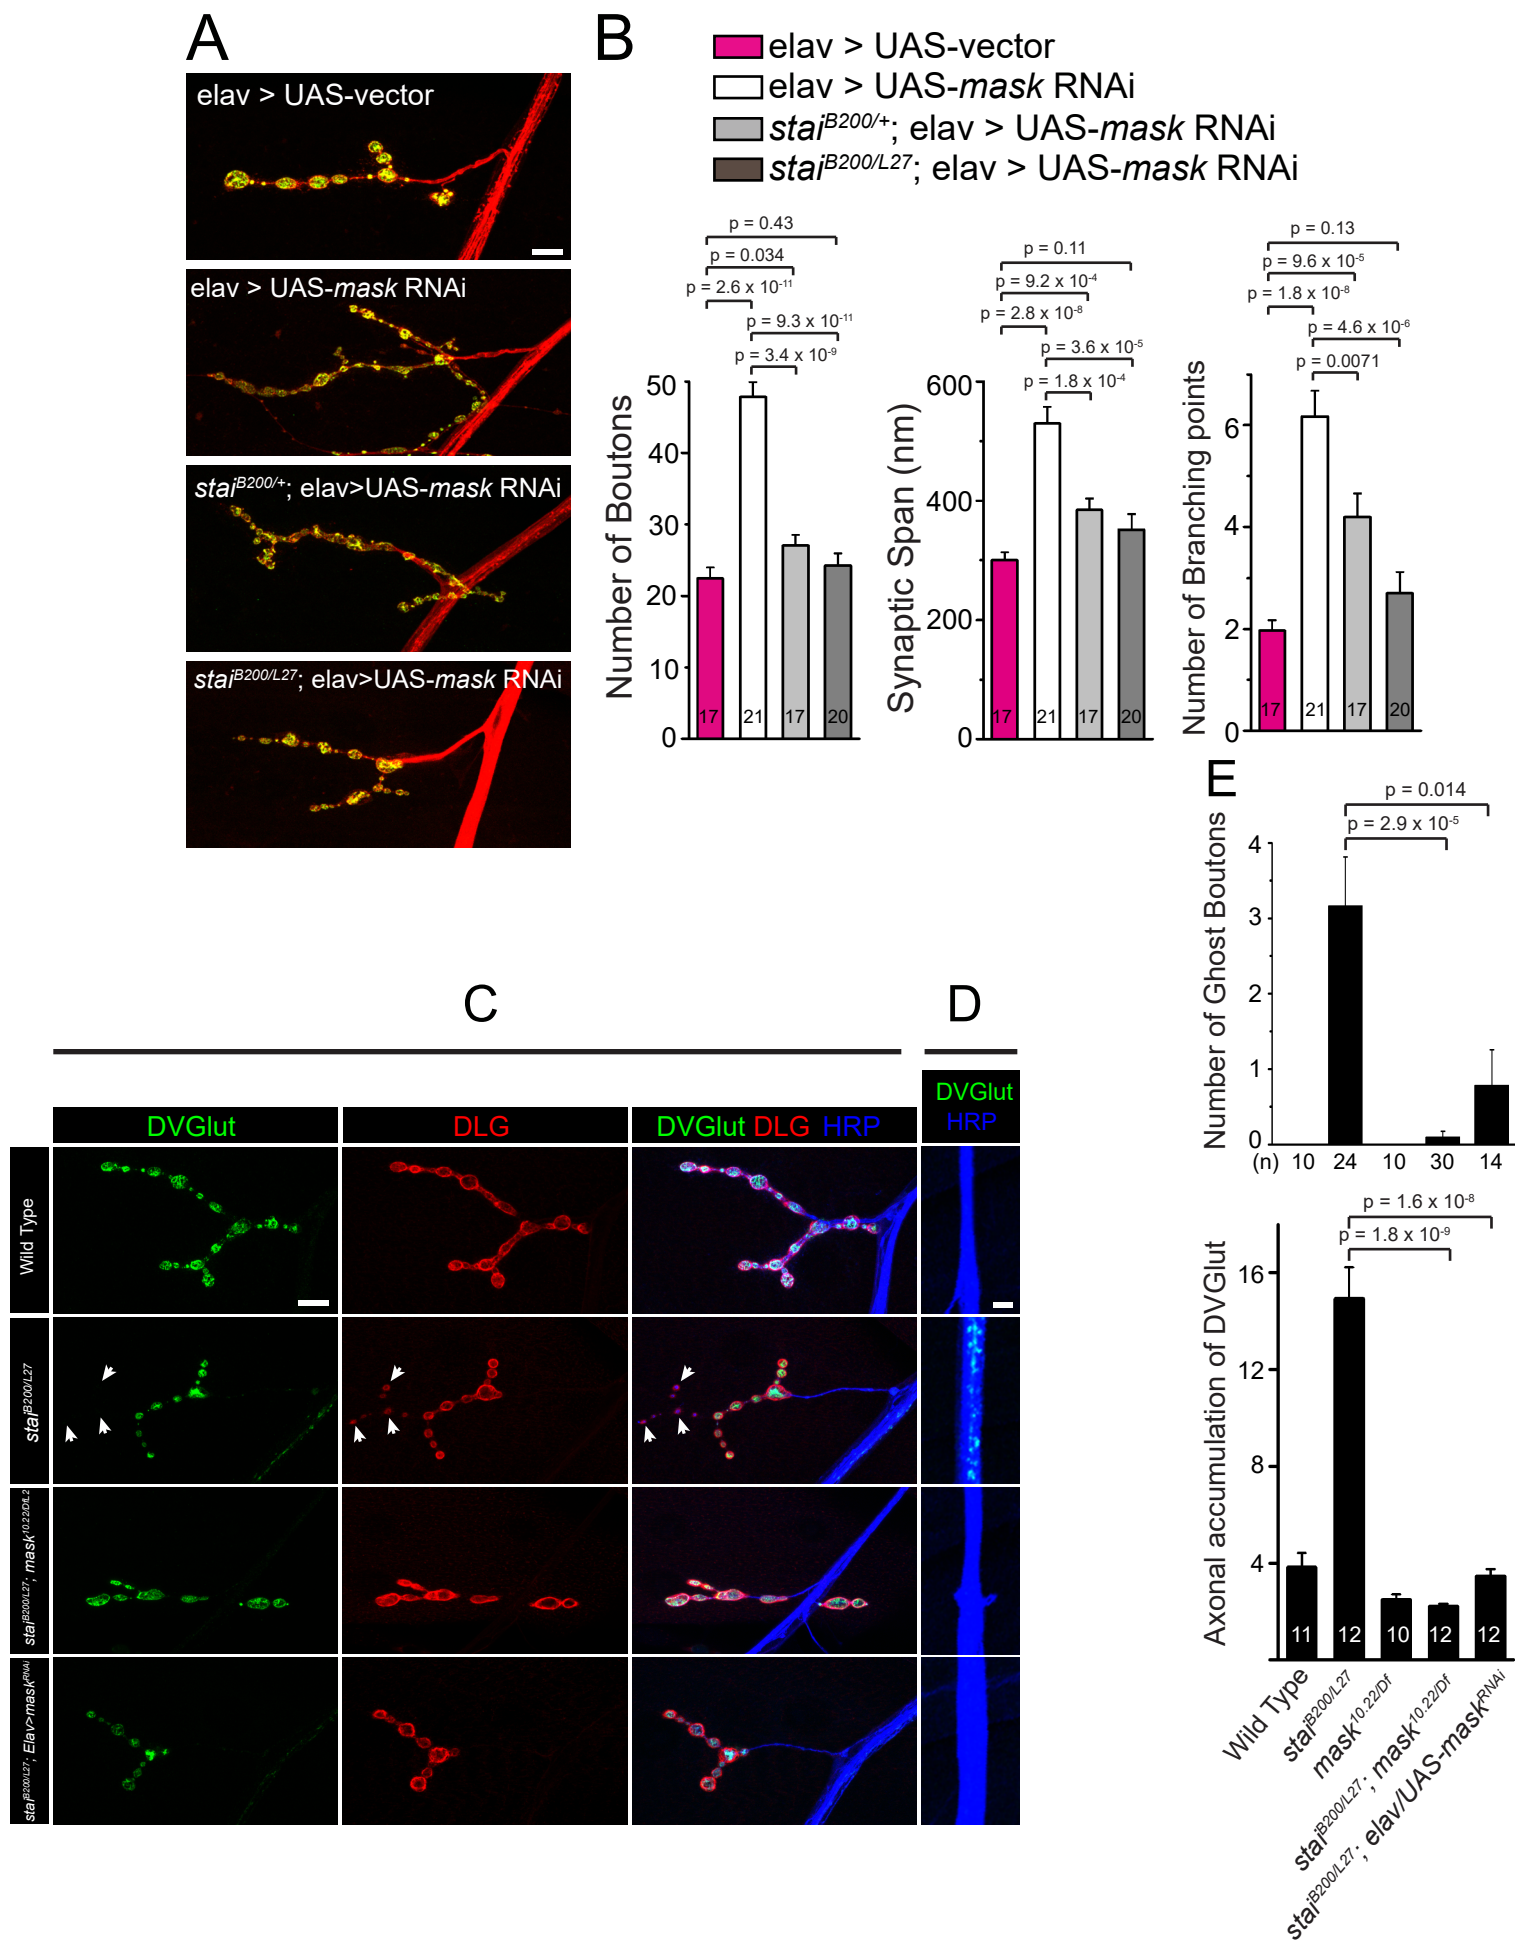

## Figure 4

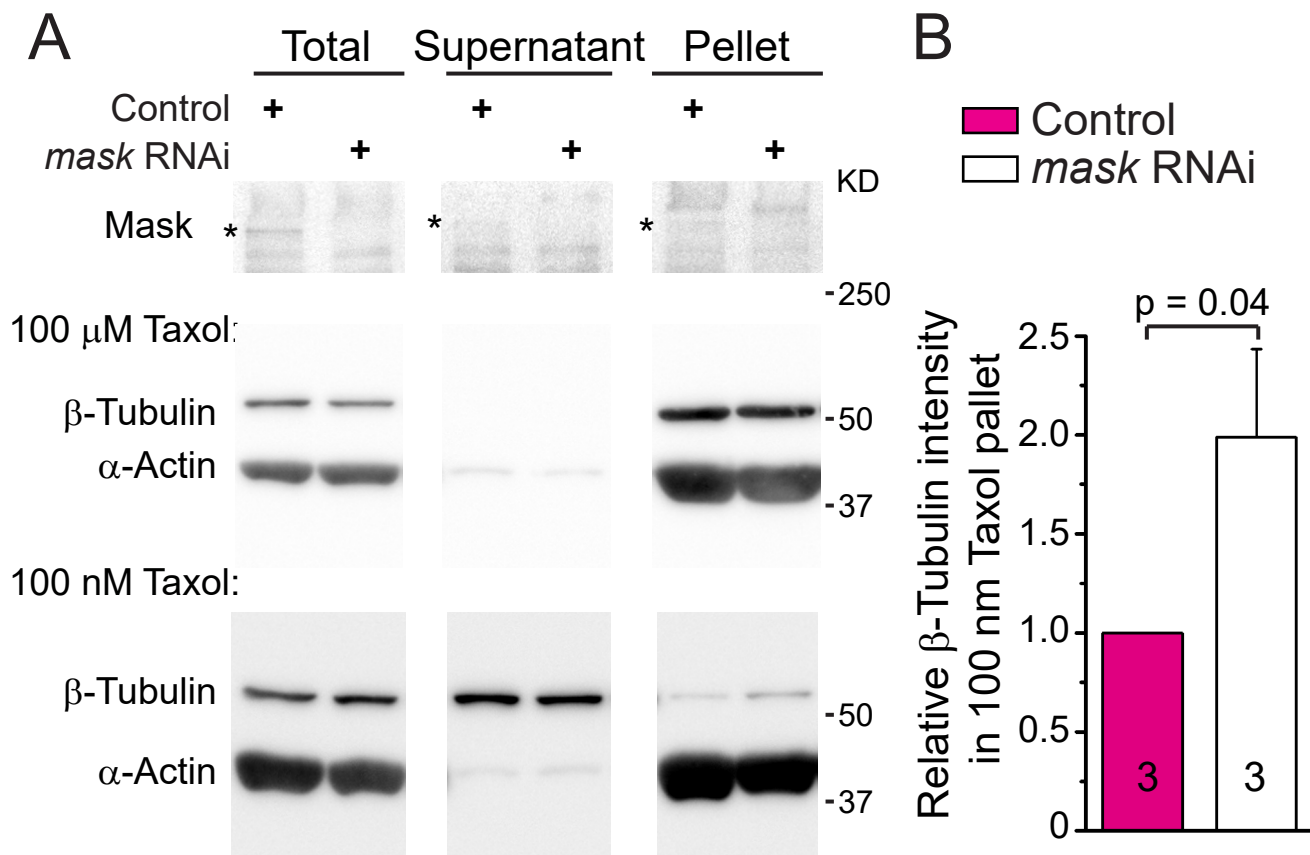

A

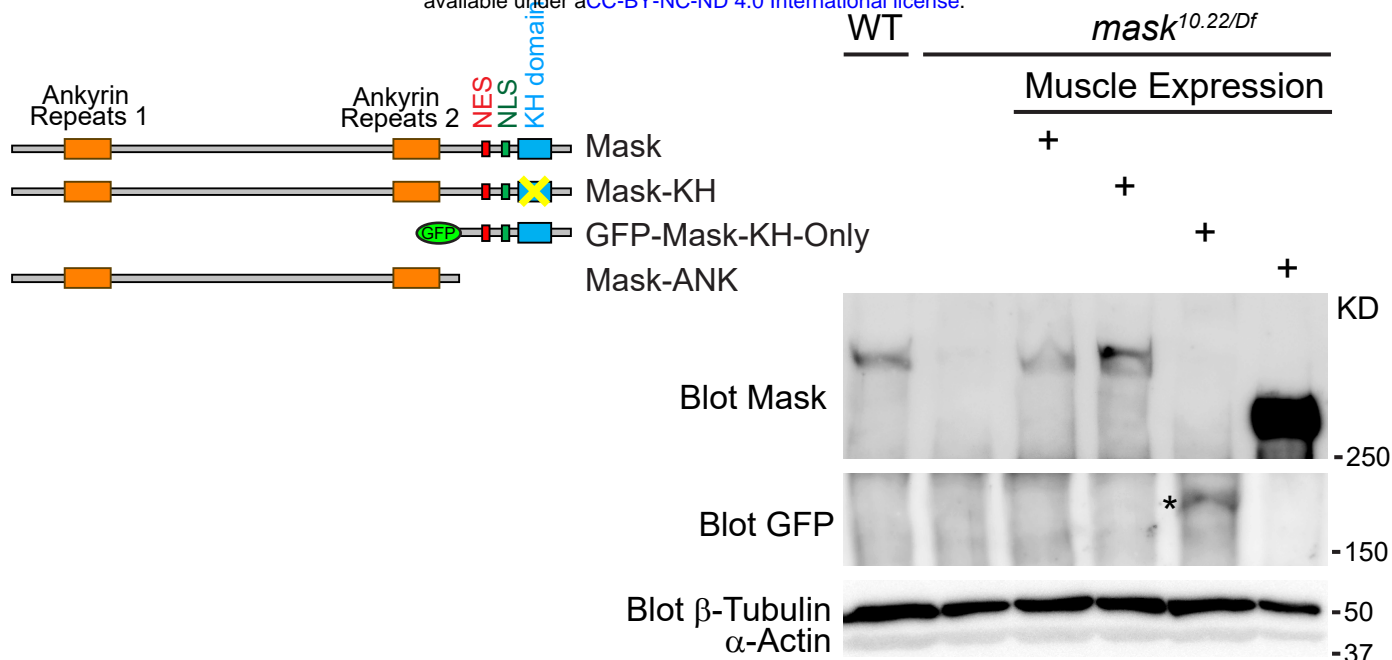

B

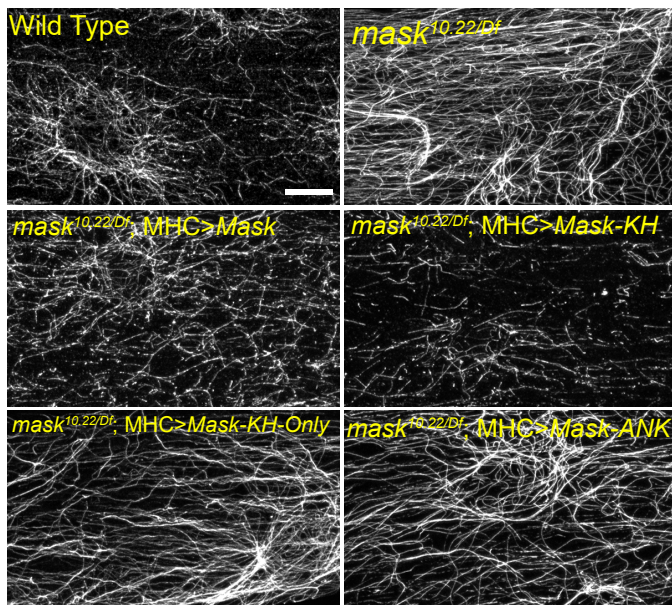

C

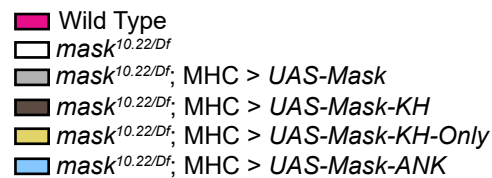

D

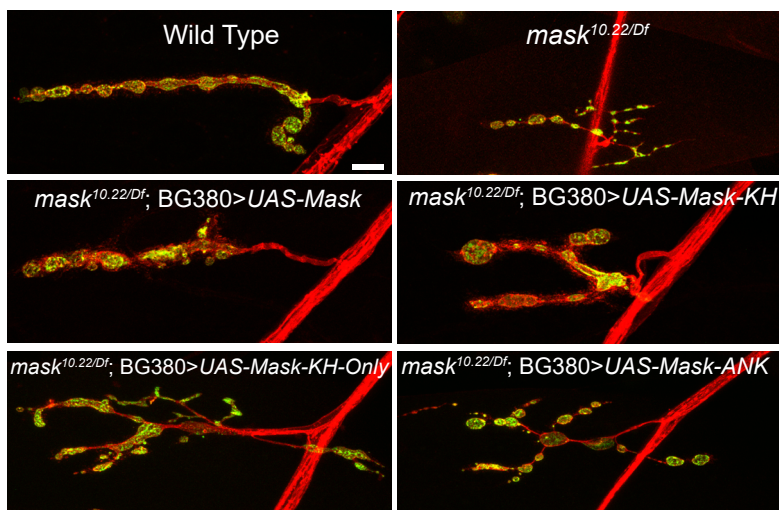

E

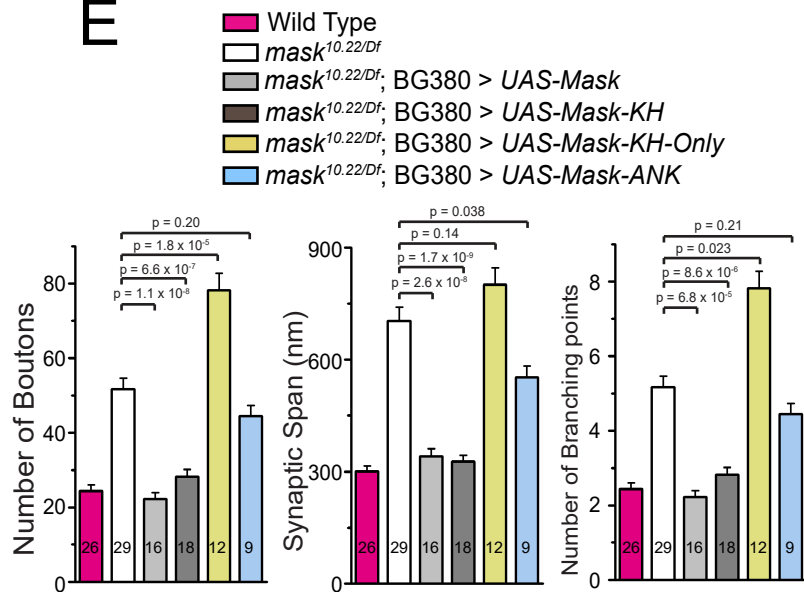

## Figure 6

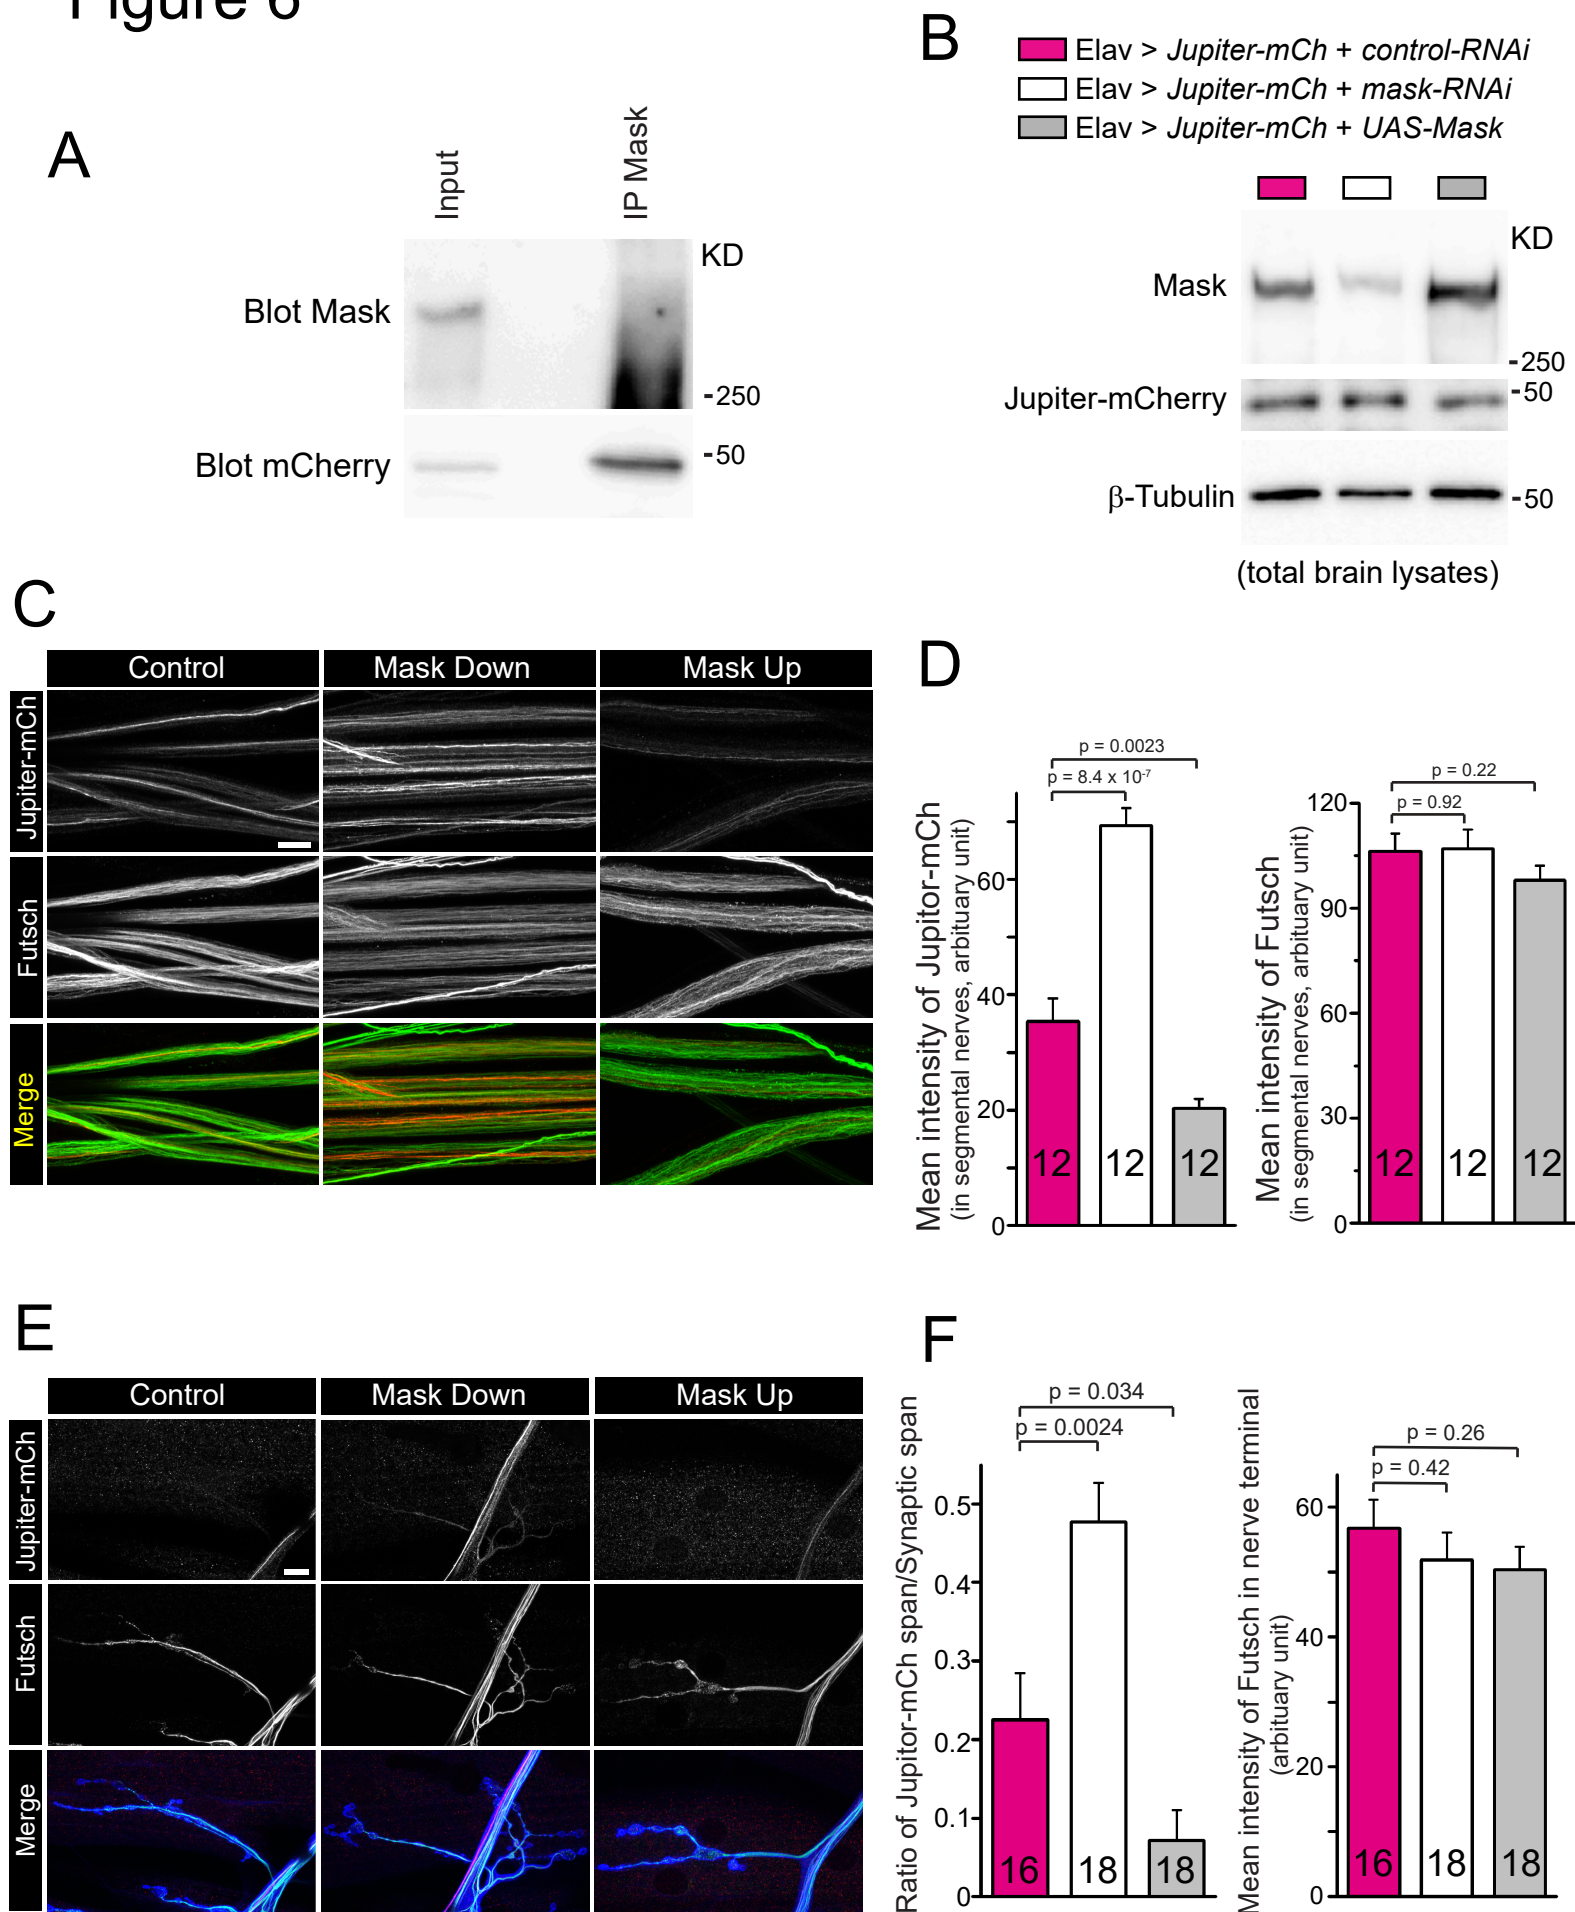

Source: https://www.biorxiv.org/content/10.1101/2020.04.22.056051v1.full.pdf
